# Supplementary material for: ChatGPT’s Ability to Answer Cancer-Related Basic Questions in Urdu: A Comparative Study with English Responses
Source: Research Square preprint supplement (doi:10.21203/rs.3.rs-7472185/v1), 2025-10-07
Supplement: Supplementary file 1 [file 78d6001935401e1f0153e78d.docx]

**ChatGPT’s Ability to Answer Basic Cancer-Related Questions in Urdu: A Comparative Analysis with English Responses**

**English Questionnaire**

| **Type of Question** | **Serial No** | **Question** |
| --- | --- | --- |
| Basic Questions | 1 | What is cancer? |
| 2 | How does cancer spread? |
| 3 | Does a lump always mean cancer? |
| 4 | Is cancer a disease of the elderly only? |
| 5 | Is there an epidemic of cancer? |
| 6 | What are the stages of cancer and what do they mean? |
| 7 | I have heard someone who starts chemotherapy have to continue it till death. Is that true? |
| 8 | Is cancer contagious? |
| 9 | What is the difference between a benign tumor and cancer? |
| 10 | Can I share food and household items while on chemotherapy? |
| 11 | Can I cook while I am on chemotherapy? |
| 12 | Should I stay at a distance from my kids while I am on chemotherapy? |
| Etiology and risk factors | 13 | What causes cancer? |
| 14 | Why do some people get cancer and not others? |
| 15 | Can attitudes or stress cause cancer? |
| 16 | How does age affect the risk of cancer? |
| 17 | Who is more likely to get cancer? |
| 18 | Is cancer a hereditary disease? |
| 19 | Do we get cancer from what we eat? |
| 20 | Are chemicals and pollutants causes of cancer? |
| 21 | Can a change in diet alter the course of cancer? |
| 22 | Does high sugar intake increase my risk of cancer? |
| 23 | Does biopsy increase the risk of cancer spreading to other parts of the body? |
| 24 | What environmental hazards can cause cancer? |
| 25 | Does cigarette smoke really cause cancer? |
| Diagnosis | 26 | When should I get tested for cancer? |
| 27 | Why isn’t there a simple universal test for cancer? |
| 28 | Why does the diagnosis seem to be so delayed in so many cancer cases? |
| 29 | How is cancer diagnosed? |
| 30 | Can cancer be detected by blood tests? |
| 31 | Why do I need a scan if my cancer is already diagnosed on biopsy? |
| Treatment | 32 | How is cancer treated? |
| 33 | How will we know if the treatment is working? |
| 34 | What is chemotherapy? |
| 35 | How to slow or reverse cancer? |
| 36 | What are the different types of chemotherapy? |
| 37 | Is there a vaccine for cancer? |
| 38 | How does radiation therapy work, and how can it help me get rid of cancer? |
| 39 | I've been told I need chemotherapy, but I'm afraid of the side effects. Why can't my doctor replace chemo with radiation? |
| 40 | How many types of treatments are there for cancer other than surgery, chemotherapy and radiotherapy, and how do they work? |
| 41 | I want to substitute my radiation plan with chemotherapy. Can I do this? |
| 42 | I underwent surgery for my cancer and the whole cancer was removed, but my cancer specialist recommended chemotherapy. Why do I need chemotherapy if the whole cancer was removed? |
| 43 | How do cancer medications work? |
| 44 | My doctor advised both radiation and chemo together, but I'm worried about the side effects. Can we do one treatment at a time instead? |
| Side effects and QoL aspects | 45 | Will I lose my hair with chemotherapy? |
| 46 | Will my hair grow back? |
| 47 | If I have a lot of side effects, does that mean the chemotherapy is working? |
| 48 | How to prevent and treat nausea caused by chemotherapy? |
| 49 | Is cancer painful? |
| 50 | Is chemotherapy painful? |
| 51 | Is it okay to have intercourse during chemotherapy? |
| 52 | Should I follow a special diet? |
| 53 | I started chemotherapy 2 weeks ago. I feel tired all the time. Is it because of chemotherapy? |
| 54 | I am losing weight while on chemotherapy. What should I do? |
| 55 | Is it possible to continue working while in treatment? |
| 56 | Can treatment affect sexual function? |
| 57 | Can cancer chemotherapy affect fertility? |
| 58 | Is exercise safe in cancer while on chemotherapy? |
| 59 | How will good nutrition help me during cancer treatment? |
| Outcomes and surveillance | 60 | Is cancer fatal? |
| 61 | Will there ever be a cure for cancer? |
| 62 | Despite so many advances in research, why isn't there more progress in improving cancer outcomes? |
| 63 | What is my life expectancy with stage IV cancer? |
| 64 | My cancer is cured. Is there any chance that it will come back? |
| 65 | I have completed my recommended therapy and am cancer-free. Why have I been told to continue regular follow-ups? |
| 66 | Can I get screened for all types of cancer? |
| 67 | Are there ways I can reduce my risk of cancer? |
| 68 | My sister was diagnosed with breast cancer at 33 years of age. Should I talk to my doctor about my risk, and what should I expect? What will be the next steps? |
